# Supplementary material
Source: publisher site journal article supplement (https://www.dovepress.com/article/243538)
Supplement: Supplementary file 1 [file get_supplementary_file.php]

# Appendix 1

## Guidance for GP tutors: questions to facilitate broad clinical diagnostic reasoning

### For the Student presenting the real patient case.

- Tell us about your patient? (Stop them when they have given demographics and main parts of presenting complaint)
- Tell us more about them? (More on the history of presenting complaint. Do this a few times)
- What is the patient's context? (home/work)
- What was the patient's perspective? (ideas, concerns and expectations)
- What matters to the patient? (goals – functional, meaningful)
- What happened to them in hospital?
- What is the plan now? (including discharge planning, MDT working)

### For the Small Group

- What are your first thoughts about possible diagnoses?
- What aspects of the patient story led to you think of these? (explore pattern recognition or any assumptions being made).
- What else might you need to know? How can you find out?
- How does this question help or hinder the hypothesis?
- How will we reprioritise our hypothesis based on new information?
- What assumptions might we be making? How can we check them out?
- How does the patient's context/perspective/goals influence our thinking?
- How would we explain our thoughts to the patient?
- What might we do next?
